# Supplementary material for: Effect of the Nucleophile’s Nature on Chloroacetanilide Herbicides Cleavage Reaction Mechanism. A DFT Study
Source: MDPI journal article supplement (doi:10.3390/ijms22136876), 2021-06-26
Supplement: s1 [file s1]

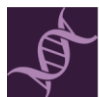

Article

# Effect of the Nucleophile's Nature on Chloroacetanilide Herbicides Cleavage Reaction Mechanism. A DFT Study

Sebastián A. Cuesta <sup>1,2</sup>, F. Javier Torres <sup>1,2</sup>, Luis Rincón <sup>1,2</sup>, José Luis Paz <sup>3</sup>, Edgar A. Márquez <sup>4,\*</sup> and José Ramón Mora <sup>1,2,\*</sup>

<sup>1</sup> Grupo de Química Computacional y Teórica (QCT-USFQ), Departamento de Ingeniería Química, Universidad San Francisco de Quito, Diego de Robles y Vía Interoceánica, Quito 170901, Ecuador; [sebastiastahoyos89@gmail.com](mailto:sebastiastahoyos89@gmail.com) (S.A.C.); [jtordes@usfq.edu.ec](mailto:jtordes@usfq.edu.ec) (F.J.T.); [lrincon@usfq.edu.ec](mailto:lrincon@usfq.edu.ec) (L.R.)

<sup>2</sup> Departamento de Ingeniería Química, Instituto de Simulación Computacional (ISC-USFQ), Universidad San Francisco de Quito, Diego de Robles y Vía Interoceánica, Quito 170901, Ecuador.

[sebastiastahoyos89@gmail.com](mailto:sebastiastahoyos89@gmail.com) (S.A.C.); [jtordes@usfq.edu.ec](mailto:jtordes@usfq.edu.ec) (F.J.T.); [lrincon@usfq.edu.ec](mailto:lrincon@usfq.edu.ec) (L.R.)

<sup>3</sup> Departamento Académico de Química Inorgánica, Facultad de Química e Ingeniería Química, Universidad Nacional Mayor de San Marcos, Cercado de Lima 15081, Perú; [jpazr@unmsm.edu.pe](mailto:jpazr@unmsm.edu.pe) (J.L.P.)

<sup>4</sup> Grupo de Investigaciones en Química y Biología, Departamento de Química y Biología, Facultad de Ciencias Exactas, Universidad del Norte, Carrera 51B, Km 5, vía Puerto Colombia, Barranquilla 081007, Colombia.

\* Correspondence: [jrmora@usfq.edu.ec](mailto:jrmora@usfq.edu.ec) (J.R.M.); [ebrazon@uninorte.edu.co](mailto:ebrazon@uninorte.edu.co) (E.A.M.)

## SUPPLEMENTARY MATERIAL

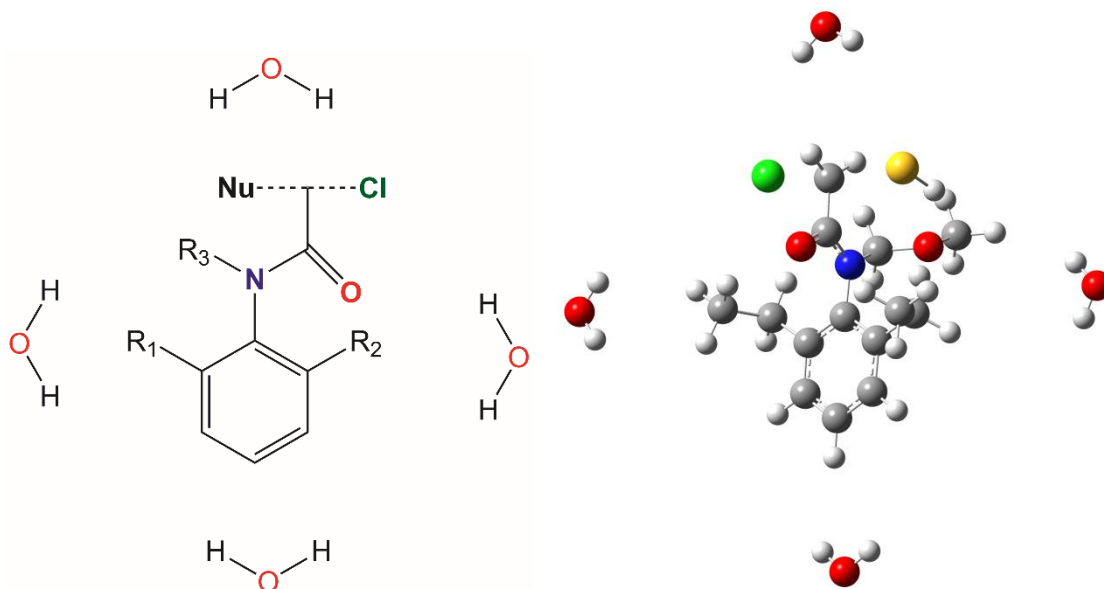

**Figure S1.** 2D and 3D representation of the 4-water model in the TS structure of Chloroacetanilide Herbicides

**Table S1.** Solvation electronic energy of chloroacetanilides and transition states

| <b>Chloroacetanilide</b> | <b>Nucleophile</b>                                      | <b>Solvation Energy<br/>(kcal/mol)</b> |
|--------------------------|---------------------------------------------------------|----------------------------------------|
| <b>Alachlor</b>          | <i>(Reagent)</i>                                        | 1.7                                    |
|                          | <i>Br<sup>-</sup> (TS)</i>                              | 0.8                                    |
|                          | <i>I<sup>-</sup> (TS)</i>                               | 1.3                                    |
|                          | <i>HS<sup>-</sup> (TS)</i>                              | 1.2                                    |
|                          | <i>S<sub>2</sub>O<sub>3</sub><sup>-2</sup> (S) (TS)</i> | 1.1                                    |
|                          | <i>S<sub>2</sub>O<sub>3</sub><sup>-2</sup> (O) (TS)</i> | 1.0                                    |
| <b>Acetochlor</b>        | <i>(Reagent)</i>                                        | 1.3                                    |
|                          | <i>Br<sup>-</sup> (TS)</i>                              | 0.7                                    |
|                          | <i>I<sup>-</sup> (TS)</i>                               | 1.2                                    |
|                          | <i>HS<sup>-</sup> (TS)</i>                              | 1.0                                    |
|                          | <i>S<sub>2</sub>O<sub>3</sub><sup>-2</sup> (S) (TS)</i> | 1.2                                    |
|                          | <i>S<sub>2</sub>O<sub>3</sub><sup>-2</sup> (O) (TS)</i> | 1.5                                    |
| <b>Propachlor</b>        | <i>(Reagent)</i>                                        | 1.5                                    |
|                          | <i>Br<sup>-</sup> (TS)</i>                              | 0.4                                    |
|                          | <i>I<sup>-</sup> (TS)</i>                               | 0.8                                    |
|                          | <i>HS<sup>-</sup> (TS)</i>                              | 0.3                                    |
|                          | <i>S<sub>2</sub>O<sub>3</sub><sup>-2</sup> (S) (TS)</i> | 1.2                                    |
|                          | <i>S<sub>2</sub>O<sub>3</sub><sup>-2</sup> (O) (TS)</i> | 0.3                                    |
| <b>Metolachlor</b>       | <i>(Reagent)</i>                                        | 0.0                                    |
|                          | <i>Br<sup>-</sup> (TS)</i>                              | -0.3                                   |
|                          | <i>I<sup>-</sup> (TS)</i>                               | -0.4                                   |
|                          | <i>HS<sup>-</sup> (TS)</i>                              | 0.7                                    |
|                          | <i>S<sub>2</sub>O<sub>3</sub><sup>-2</sup> (S) (TS)</i> | 0.2                                    |
|                          | <i>S<sub>2</sub>O<sub>3</sub><sup>-2</sup> (O) (TS)</i> | 0.9                                    |

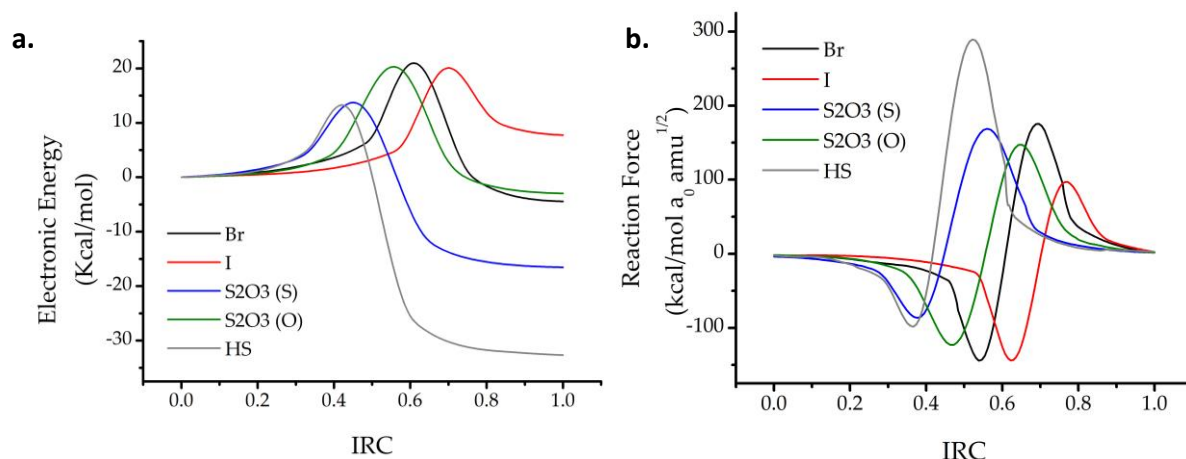

**Figure S2.** IRC (a) and RF (b) plots for the nucleophilic substitution of acetochlor

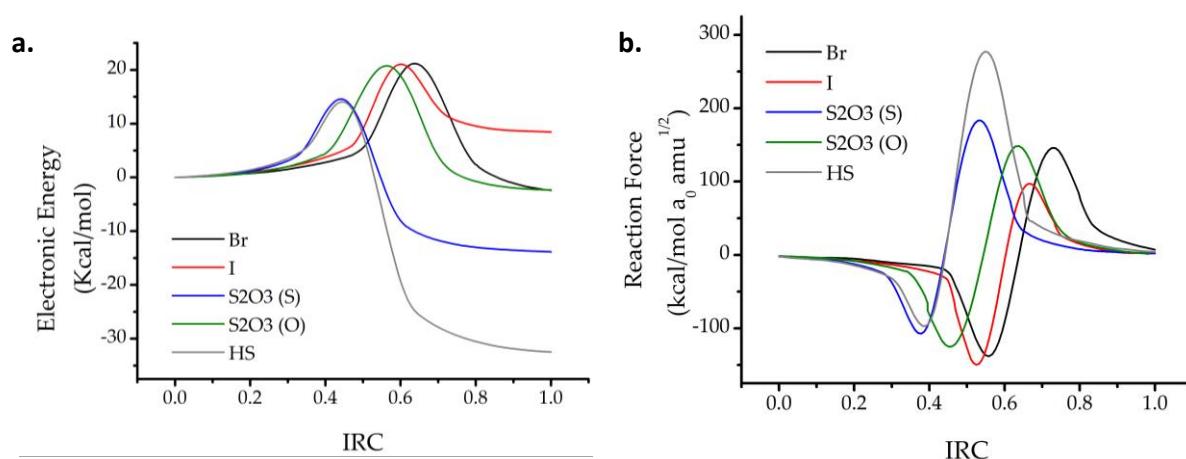

**Figure S3.** IRC (a) and RF (b) plots for the nucleophilic substitution of metolachlor.

**Table S2.** Reaction force Works (in Kcal/mol) involved in the nucleophilic substitution of propachlor

| <i>Nucleophile</i>                                                     | <i>w1</i> | <i>w2</i> | <i>w3</i> | <i>w4</i> |
|------------------------------------------------------------------------|-----------|-----------|-----------|-----------|
| <i>Br</i> <sup>-</sup>                                                 | 13.6      | 8.0       | -11.0     | -14.6     |
| <i>I</i> <sup>-</sup>                                                  | 11.9      | 7.9       | -4.4      | -7.8      |
| <i>HS</i> <sup>-</sup>                                                 | 9.1       | 4.4       | -22.4     | -26.2     |
| <i>S</i> <sub>2</sub> <i>O</i> <sub>3</sub> <sup>-2</sup> ( <i>S</i> ) | 9.4       | 5.1       | -10.9     | -18.0     |
| <i>S</i> <sub>2</sub> <i>O</i> <sub>3</sub> <sup>-2</sup> ( <i>O</i> ) | 12.5      | 8.7       | -10.0     | -14.3     |

**Table S3.** Reaction force Works (in Kcal/mol) involved in the nucleophilic substitution of metolachlor

| <i>Nucleophile</i>                                                              | <i>w1</i> | <i>w2</i> | <i>w3</i> | <i>w4</i> |
|---------------------------------------------------------------------------------|-----------|-----------|-----------|-----------|
| <i>Br</i> <sup>-</sup>                                                          | 13.1      | 8.0       | -9.1      | -14.4     |
| <i>I</i> <sup>-</sup>                                                           | 13.0      | 8.0       | -4.5      | -8.1      |
| <i>HS</i> <sup>-</sup>                                                          | 9.6       | 4.4       | -19.2     | -27.3     |
| <i>S</i> <sub>2</sub> <i>O</i> <sub>3</sub> <sup>-2</sup>                       | 9.3       | 5.1       | -12.4     | -15.9     |
| <i>O</i> <sub>2</sub> <i>S</i> <sub>2</sub> <i>O</i> <sub>3</sub> <sup>-2</sup> | 13.1      | 7.4       | -10.2     | -12.9     |

**Table S4.** Reaction force Works (in Kcal/mol) involved in the nucleophilic substitution of alachlor

| <i>Nucleophile</i>                                                              | <i>w1</i> | <i>w2</i> | <i>w3</i> | <i>w4</i> |
|---------------------------------------------------------------------------------|-----------|-----------|-----------|-----------|
| <i>Br</i> <sup>-</sup>                                                          | 12.3      | 7.7       | -9.5      | -15.8     |
| <i>I</i> <sup>-</sup>                                                           | 11.8      | 8.1       | -4.6      | -7.8      |
| <i>HS</i> <sup>-</sup>                                                          | 8.9       | 4.3       | -20.4     | -29.2     |
| <i>S</i> <sub>2</sub> <i>O</i> <sub>3</sub> <sup>-2</sup>                       | 8.9       | 5.0       | -12.9     | -17.8     |
| <i>O</i> <sub>2</sub> <i>S</i> <sub>2</sub> <i>O</i> <sub>3</sub> <sup>-2</sup> | 12.6      | 7.5       | -10.3     | -12.9     |

**Table S5.** Reaction force Works (in Kcal/mol) involved in the nucleophilic substitution of acetochlor

| <i>Nucleophile</i>                                                              | <i>w1</i> | <i>w2</i> | <i>w3</i> | <i>w4</i> |
|---------------------------------------------------------------------------------|-----------|-----------|-----------|-----------|
| <i>Br</i> <sup>-</sup>                                                          | 13.2      | 7.7       | -11.1     | -14.2     |
| <i>I</i> <sup>-</sup>                                                           | 11.7      | 8.1       | -4.6      | -7.7      |
| <i>HS</i> <sup>-</sup>                                                          | 8.7       | 4.5       | -19.6     | -26.1     |
| <i>S</i> <sub>2</sub> <i>O</i> <sub>3</sub> <sup>-2</sup>                       | 8.7       | 5.0       | -12.9     | -17.3     |
| <i>O</i> <sub>2</sub> <i>S</i> <sub>2</sub> <i>O</i> <sub>3</sub> <sup>-2</sup> | 12.6      | 7.5       | -10.4     | -12.8     |

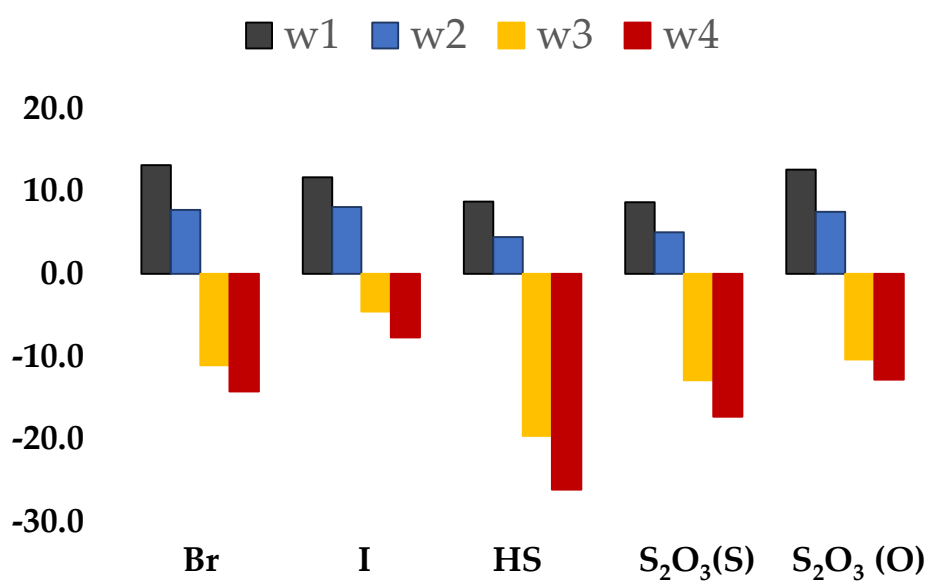

**Figure S4.** Reaction force work 1 and 2 for the nucleophilic substitution reaction of acetochlor.

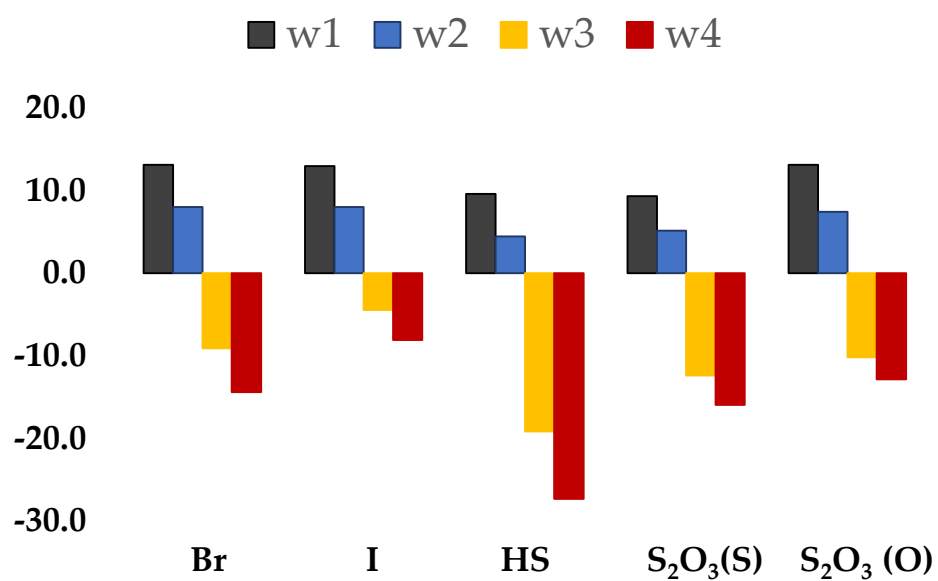

**Figure S5.** Reaction force work 1 and 2 for the nucleophilic substitution reaction of metolachlor.

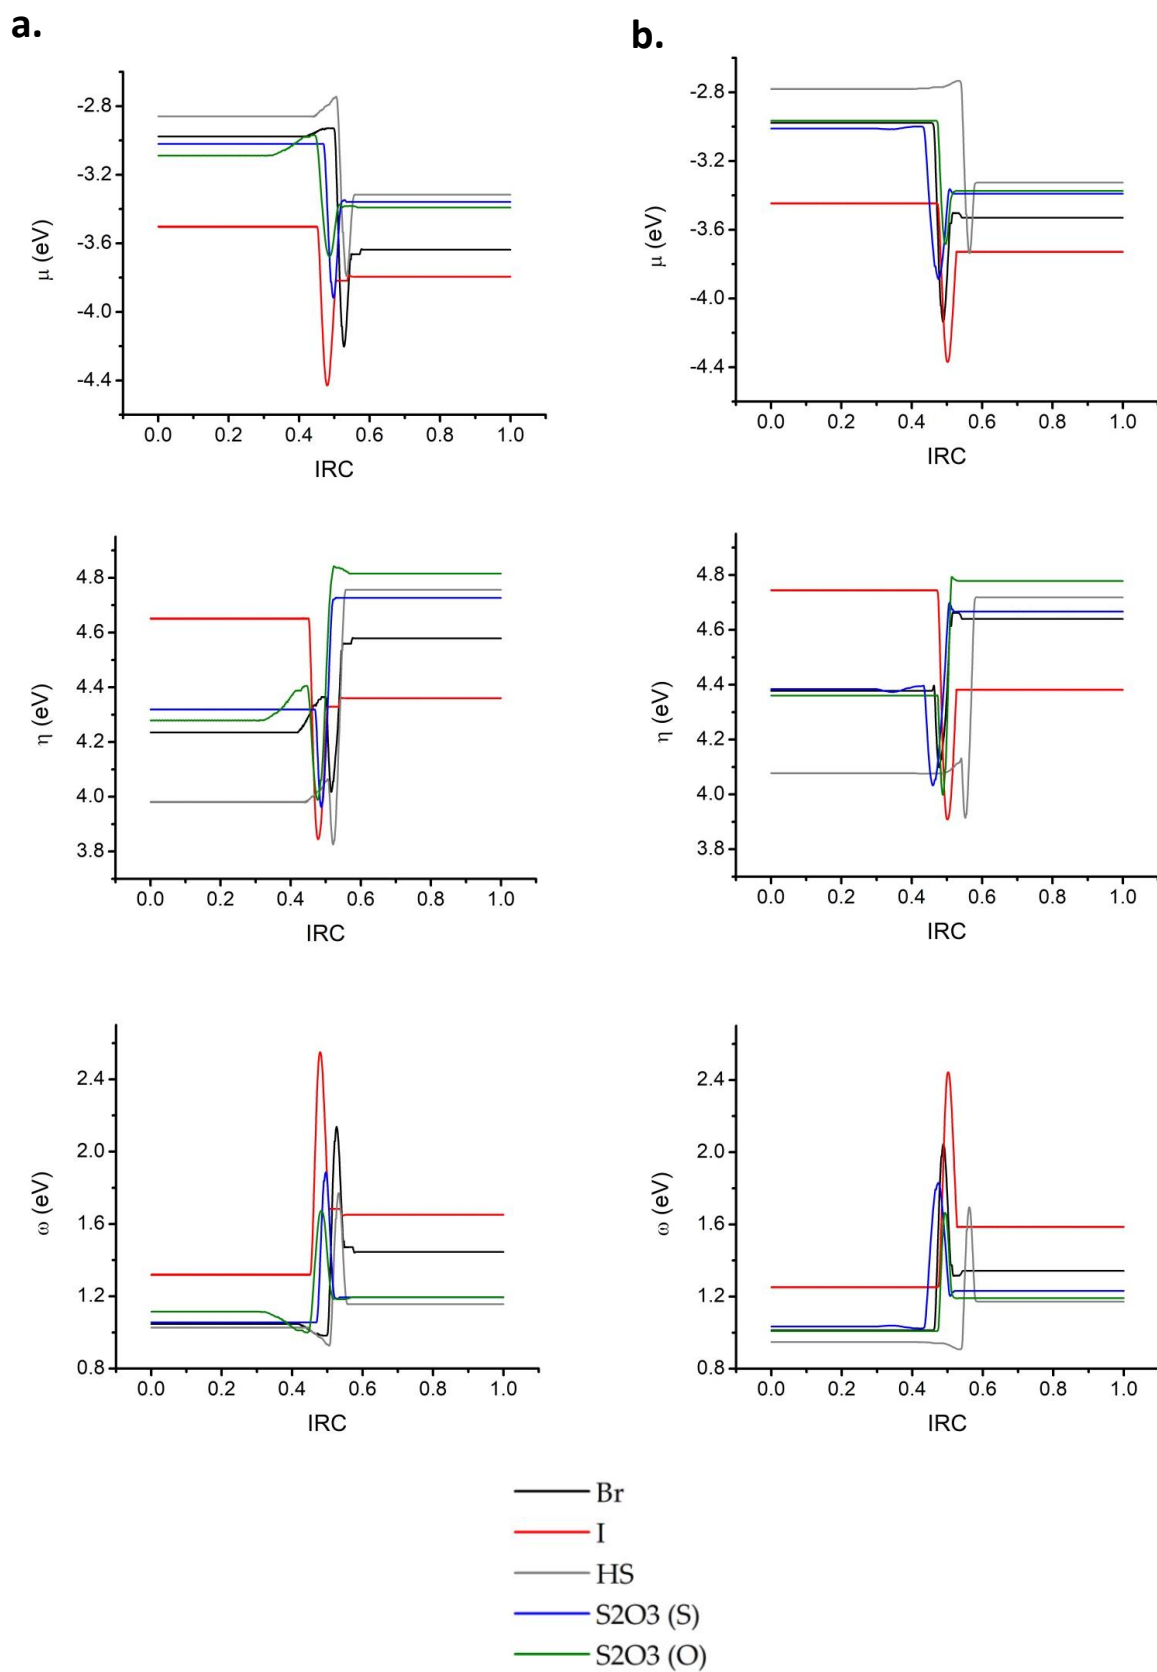

**Figure S6.**  $\mu$ ,  $\eta$ , and  $\omega$  plots for the nucleophilic substitution of alachlor (a) and propachlor (b).

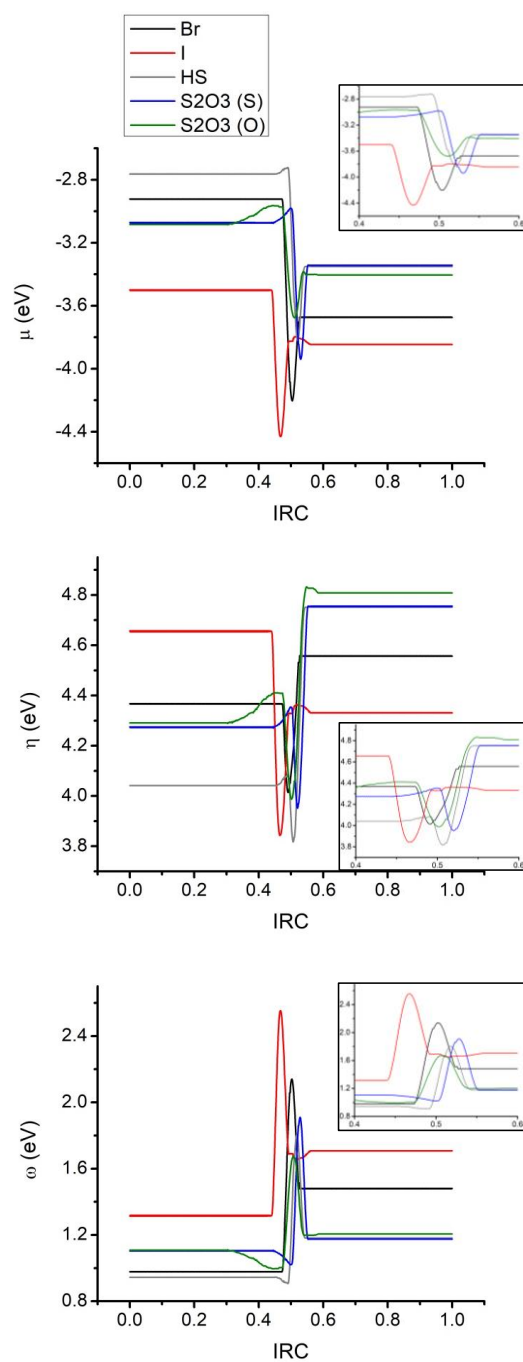

**Figure S7.**  $\mu$ ,  $\eta$ , and  $\omega$  plots for the nucleophilic substitution of acetochlor.

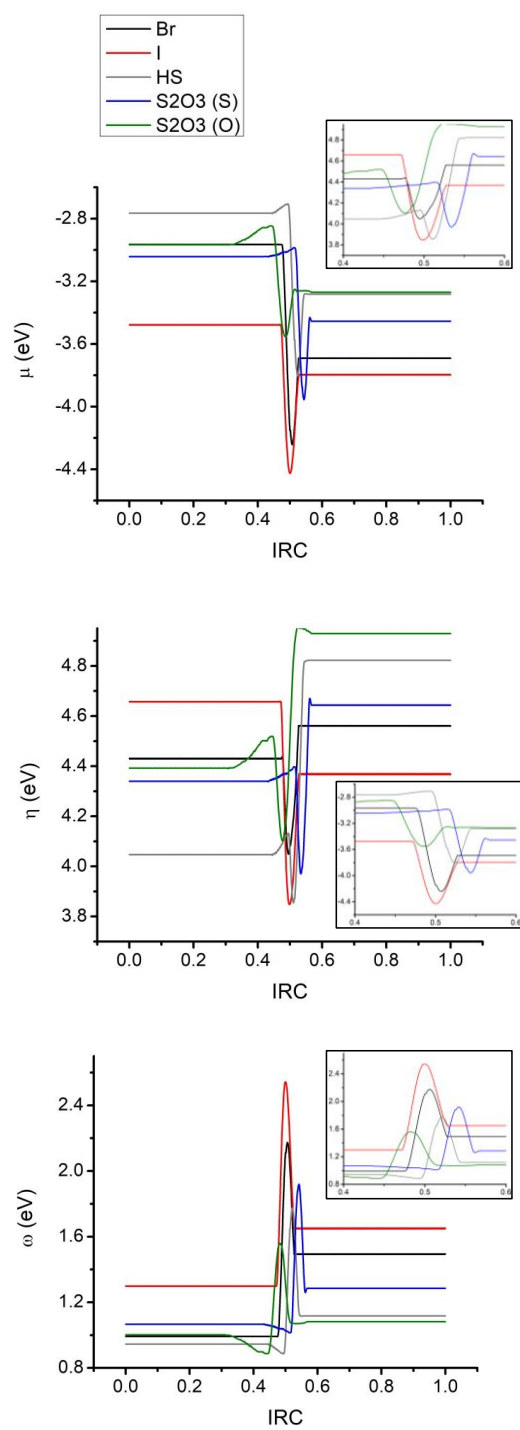

**Figure S8.**  $\mu$ ,  $\eta$ , and  $\omega$  plots for the nucleophilic substitution of metolachlor.



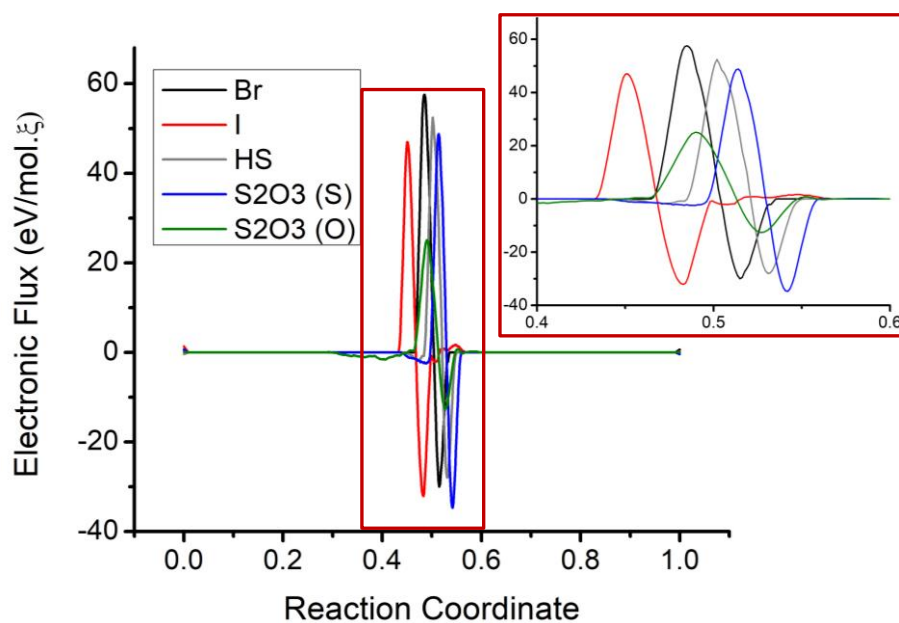

**Figure S9.** REF plots for the nucleophilic substitution of acetochlor.

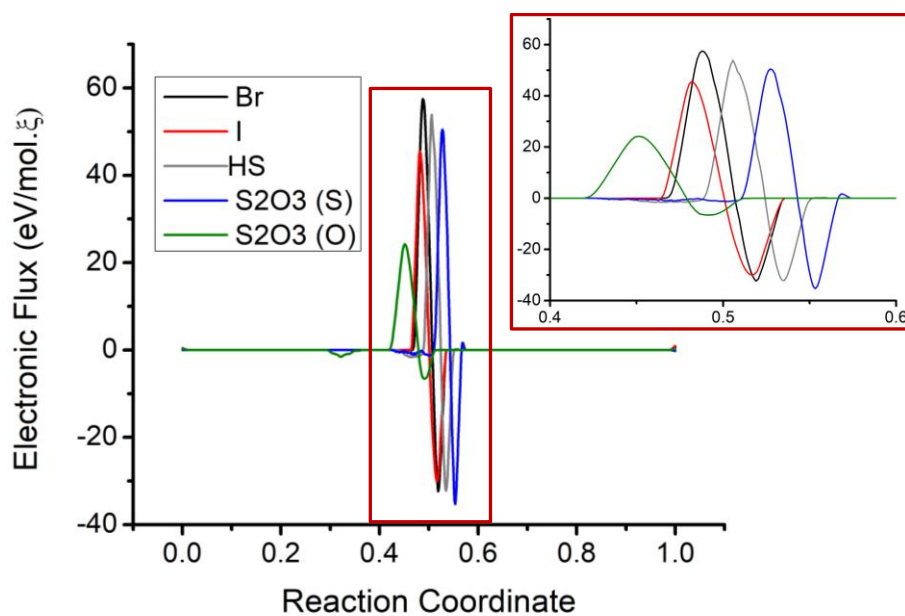

**Figure S10.** REF plots for the nucleophilic substitution of metolachlor.

**Table S6.** Charge analysis of the nucleophilic attack mechanism of Acetochlor

| Nucleophile                                     |             | Cl     | C      | Nu     |
|-------------------------------------------------|-------------|--------|--------|--------|
| Br <sup>-</sup>                                 | <i>R</i>    | -0.123 | -0.397 | -1.000 |
|                                                 | <i>TS</i>   | -0.577 | -0.330 | -0.576 |
|                                                 | <i>P</i>    | -1.000 | -0.489 | -0.034 |
|                                                 | $\delta Qi$ | 0.454  | -0.067 | -0.424 |
| I <sup>-</sup>                                  | <i>R</i>    | -0.123 | -0.397 | -1.000 |
|                                                 | <i>TS</i>   | -0.622 | -0.382 | -0.500 |
|                                                 | <i>P</i>    | -1.000 | -0.630 | 0.108  |
|                                                 | $\delta Qi$ | 0.499  | -0.015 | -0.500 |
| HS <sup>-</sup>                                 | <i>R</i>    | -0.123 | -0.397 | -1.108 |
|                                                 | <i>TS</i>   | -0.509 | -0.356 | -0.744 |
|                                                 | <i>P</i>    | -1.000 | -0.557 | -0.121 |
|                                                 | $\delta Qi$ | 0.386  | -0.041 | -0.364 |
| S <sub>2</sub> O <sub>3</sub> <sup>2-</sup> (S) | <i>R</i>    | -0.123 | -0.397 | -0.843 |
|                                                 | <i>TS</i>   | -0.541 | -0.356 | -0.545 |
|                                                 | <i>P</i>    | -1.000 | -0.584 | -0.089 |
|                                                 | $\delta Qi$ | 0.418  | -0.041 | -0.298 |
| S <sub>2</sub> O <sub>3</sub> <sup>2-</sup> (O) | <i>R</i>    | -0.123 | -0.397 | -1.125 |
|                                                 | <i>TS</i>   | -0.606 | -0.183 | -0.981 |
|                                                 | <i>P</i>    | -1.000 | -0.131 | -0.794 |
|                                                 | $\delta Qi$ | 0.483  | -0.214 | -0.144 |

**Table S7.** Charge analysis of the nucleophilic attack mechanism of Alachlor

| Nucleophile     |             | Cl     | C      | Nu     |
|-----------------|-------------|--------|--------|--------|
| Br <sup>-</sup> | <i>R</i>    | -0.123 | -0.396 | -1.000 |
|                 | <i>TS</i>   | -0.578 | -0.329 | -0.576 |
|                 | <i>P</i>    | -1.000 | -0.488 | -0.033 |
|                 | $\delta Qi$ | 0.455  | -0.067 | -0.424 |
| I <sup>-</sup>  | <i>R</i>    | -0.123 | -0.396 | -1.000 |
|                 | <i>TS</i>   | -0.621 | -0.381 | -0.500 |
|                 | <i>P</i>    | -1.000 | -0.629 | 0.108  |
|                 | $\delta Qi$ | 0.498  | -0.015 | -0.500 |
| HS <sup>-</sup> | <i>R</i>    | -0.123 | -0.396 | -1.108 |

|                                                    |             |        |        |        |
|----------------------------------------------------|-------------|--------|--------|--------|
|                                                    | <i>TS</i>   | -0.497 | -0.357 | -0.746 |
|                                                    | <i>P</i>    | -1.000 | -0.558 | -0.120 |
|                                                    | $\delta Qi$ | 0.374  | -0.039 | -0.362 |
| <b>S<sub>2</sub>O<sub>3</sub><sup>-2</sup> (S)</b> | <i>R</i>    | -0.123 | -0.396 | -0.843 |
|                                                    | <i>TS</i>   | -0.539 | -0.354 | -0.544 |
|                                                    | <i>P</i>    | -1.000 | -0.584 | -0.089 |
|                                                    | $\delta Qi$ | 0.416  | -0.042 | -0.299 |
| <b>S<sub>2</sub>O<sub>3</sub><sup>-2</sup> (O)</b> | <i>R</i>    | -0.123 | -0.396 | -1.125 |
|                                                    | <i>TS</i>   | -0.607 | -0.181 | -0.981 |
|                                                    | <i>P</i>    | -1.000 | -0.131 | -0.794 |
|                                                    | $\delta Qi$ | 0.484  | -0.215 | -0.144 |

**Table S8.** Charge analysis of the nucleophilic attack mechanism of Metolachlor

| <b>Nucleophile</b>                                 |             | <b>Cl</b> | <b>C</b> | <b>Nu</b> |
|----------------------------------------------------|-------------|-----------|----------|-----------|
| <b>Br<sup>-</sup></b>                              | <i>R</i>    | -0.124    | -0.391   | -1.000    |
|                                                    | <i>TS</i>   | -0.586    | -0.325   | -0.569    |
|                                                    | <i>P</i>    | -1.000    | -0.483   | -0.035    |
|                                                    | $\delta Qi$ | 0.462     | -0.066   | -0.431    |
| <b>I<sup>-</sup></b>                               | <i>R</i>    | -0.124    | -0.391   | -1.000    |
|                                                    | <i>TS</i>   | -0.629    | -0.375   | -0.497    |
|                                                    | <i>P</i>    | -1.000    | -0.624   | 0.107     |
|                                                    | $\delta Qi$ | 0.505     | -0.016   | -0.503    |
| <b>HS<sup>-</sup></b>                              | <i>R</i>    | -0.124    | -0.391   | -1.108    |
|                                                    | <i>TS</i>   | -0.511    | -0.349   | -0.737    |
|                                                    | <i>P</i>    | -1.000    | -0.552   | -0.122    |
|                                                    | $\delta Qi$ | 0.387     | -0.042   | -0.371    |
| <b>S<sub>2</sub>O<sub>3</sub><sup>-2</sup> (S)</b> | <i>R</i>    | -0.124    | -0.391   | -0.843    |
|                                                    | <i>TS</i>   | -0.555    | -0.349   | -0.551    |
|                                                    | <i>P</i>    | -1.000    | -0.579   | -0.088    |
|                                                    | $\delta Qi$ | 0.431     | -0.042   | -0.292    |
| <b>S<sub>2</sub>O<sub>3</sub><sup>-2</sup> (O)</b> | <i>R</i>    | -0.124    | -0.391   | -1.125    |
|                                                    | <i>TS</i>   | -0.616    | -0.179   | -0.989    |
|                                                    | <i>P</i>    | -1.000    | -0.129   | -0.794    |
|                                                    | $\delta Qi$ | 0.492     | -0.212   | -0.136    |

**Table S9.** Charge analysis of the nucleophilic attack mechanism of Propachlor

| Nucleophile                                     |             | Cl     | C      | Nu     |
|-------------------------------------------------|-------------|--------|--------|--------|
| Br <sup>-</sup>                                 | <i>R</i>    | -0.128 | -0.394 | -1.000 |
|                                                 | <i>TS</i>   | -0.586 | -0.321 | -0.581 |
|                                                 | <i>P</i>    | -1.000 | -0.486 | -0.040 |
|                                                 | $\delta Qi$ | 0.458  | -0.073 | -0.419 |
| I <sup>-</sup>                                  | <i>R</i>    | -0.128 | -0.394 | -1.000 |
|                                                 | <i>TS</i>   | -0.631 | -0.372 | -0.503 |
|                                                 | <i>P</i>    | -1.000 | -0.633 | 0.098  |
|                                                 | $\delta Qi$ | 0.503  | -0.022 | -0.497 |
| HS <sup>-</sup>                                 | <i>R</i>    | -0.128 | -0.394 | -1.108 |
|                                                 | <i>TS</i>   | -0.509 | -0.345 | -0.740 |
|                                                 | <i>P</i>    | -1.000 | -0.556 | -0.123 |
|                                                 | $\delta Qi$ | 0.381  | -0.049 | -0.368 |
| S <sub>2</sub> O <sub>3</sub> <sup>2-</sup> (S) | <i>R</i>    | -0.128 | -0.394 | -0.843 |
|                                                 | <i>TS</i>   | -0.561 | -0.345 | -0.548 |
|                                                 | <i>P</i>    | -1.000 | -0.583 | -0.090 |
|                                                 | $\delta Qi$ | 0.433  | -0.049 | -0.295 |
| S <sub>2</sub> O <sub>3</sub> <sup>2-</sup> (O) | <i>R</i>    | -0.128 | -0.394 | -1.125 |
|                                                 | <i>TS</i>   | -0.623 | -0.174 | -0.987 |
|                                                 | <i>P</i>    | -1.000 | -0.130 | -0.793 |
|                                                 | $\delta Qi$ | 0.495  | -0.220 | -0.138 |

**Table S10.**Wiberg bond indexes (Bi), evolution percent, synchronicity (Sy) and average value (%Evav) for the nucleophilic substitution of acetochlor

|                 |              | Wiberg bond index (Bi) | Sy           | %Evav |      |
|-----------------|--------------|------------------------|--------------|-------|------|
| Br <sup>-</sup> |              | $B_{(C-Cl)}$           | $B_{(C-Nu)}$ |       |      |
|                 | <i>R</i>     | 0.979                  | 0.000        |       |      |
|                 | <i>TS</i>    | 0.453                  | 0.437        | 0.904 | 48.9 |
|                 | <i>P</i>     | 0.000                  | 0.987        |       |      |
|                 | % <i>Evi</i> | 53.67                  | 44.23        |       |      |
| I <sup>-</sup>  |              | $B_{(C-Cl)}$           | $B_{(C-Nu)}$ |       |      |
|                 | <i>R</i>     | 0.979                  | 0.000        |       |      |
|                 | <i>TS</i>    | 0.384                  | 0.513        | 0.928 | 56.7 |
|                 | <i>P</i>     | 0.000                  | 0.974        |       |      |
|                 | % <i>Evi</i> | 60.80                  | 52.61        |       |      |

|                                                    |             |                           |                           |       |      |
|----------------------------------------------------|-------------|---------------------------|---------------------------|-------|------|
| <b>HS<sup>-</sup></b>                              |             | <i>B<sub>(C-Cl)</sub></i> | <i>B<sub>(C-Nu)</sub></i> | 0.897 | 41.8 |
|                                                    | <i>R</i>    | 0.979                     | 0.000                     |       |      |
|                                                    | <i>TS</i>   | 0.528                     | 0.376                     |       |      |
|                                                    | <i>P</i>    | 0.000                     | 1.003                     |       |      |
|                                                    | <i>%Evi</i> | 46.09                     | 37.46                     |       |      |
| <b>S<sub>2</sub>O<sub>3</sub><sup>2-</sup> (S)</b> |             | <i>B<sub>(C-Cl)</sub></i> | <i>B<sub>(C-Nu)</sub></i> | 0.892 | 45.2 |
|                                                    | <i>R</i>    | 0.979                     | 0.000                     |       |      |
|                                                    | <i>TS</i>   | 0.489                     | 0.398                     |       |      |
|                                                    | <i>P</i>    | 0.000                     | 0.987                     |       |      |
|                                                    | <i>%Evi</i> | 50.08                     | 40.35                     |       |      |
| <b>S<sub>2</sub>O<sub>3</sub><sup>2-</sup> (O)</b> |             | <i>B<sub>(C-Cl)</sub></i> | <i>B<sub>(C-Nu)</sub></i> | 0.839 | 45.7 |
|                                                    | <i>R</i>    | 0.979                     | 0.000                     |       |      |
|                                                    | <i>TS</i>   | 0.460                     | 0.331                     |       |      |
|                                                    | <i>P</i>    | 0.000                     | 0.863                     |       |      |
|                                                    | <i>%Evi</i> | 53.03                     | 38.32                     |       |      |

**Table S11.**Wiberg bond indexes (Bi), evolution percent, synchronicity (Sy) and average value (%Evav) for the nucleophilic substitution of alachlor

|                                                    |             | Wiberg bond<br>index (Bi) |                           | Sy    | %Evav |
|----------------------------------------------------|-------------|---------------------------|---------------------------|-------|-------|
| <b>Br<sup>-</sup></b>                              |             | <i>B<sub>(C-Cl)</sub></i> | <i>B<sub>(C-Nu)</sub></i> | 0.904 | 49.1  |
|                                                    | <i>R</i>    | 0.978                     | 0.000                     |       |       |
|                                                    | <i>TS</i>   | 0.452                     | 0.438                     |       |       |
|                                                    | <i>P</i>    | 0.000                     | 0.987                     |       |       |
|                                                    | <i>%Evi</i> | 53.80                     | 44.41                     |       |       |
| <b>I<sup>-</sup></b>                               |             | <i>B<sub>(C-Cl)</sub></i> | <i>B<sub>(C-Nu)</sub></i> | 0.928 | 56.8  |
|                                                    | <i>R</i>    | 0.978                     | 0.000                     |       |       |
|                                                    | <i>TS</i>   | 0.383                     | 0.513                     |       |       |
|                                                    | <i>P</i>    | 0.000                     | 0.974                     |       |       |
|                                                    | <i>%Evi</i> | 60.82                     | 52.69                     |       |       |
| <b>HS<sup>-</sup></b>                              |             | <i>B<sub>(C-Cl)</sub></i> | <i>B<sub>(C-Nu)</sub></i> | 0.899 | 40.8  |
|                                                    | <i>R</i>    | 0.978                     | 0.000                     |       |       |
|                                                    | <i>TS</i>   | 0.539                     | 0.368                     |       |       |
|                                                    | <i>P</i>    | 0.000                     | 1.002                     |       |       |
|                                                    | <i>%Evi</i> | 44.93                     | 36.69                     |       |       |
| <b>S<sub>2</sub>O<sub>3</sub><sup>2-</sup> (S)</b> |             | <i>B<sub>(C-Cl)</sub></i> | <i>B<sub>(C-Nu)</sub></i> | 0.892 | 45.0  |
|                                                    | <i>R</i>    | 0.978                     | 0.000                     |       |       |
|                                                    | <i>TS</i>   | 0.490                     | 0.397                     |       |       |

|                                                    |              |                            |                            |       |      |
|----------------------------------------------------|--------------|----------------------------|----------------------------|-------|------|
|                                                    | <i>P</i>     | 0.000                      | 0.987                      |       |      |
|                                                    | % <i>Evi</i> | 49.92                      | 40.18                      |       |      |
|                                                    |              | <i>B</i> <sub>(C-Cl)</sub> | <i>B</i> <sub>(C-Nu)</sub> |       |      |
|                                                    | <i>R</i>     | 0.978                      | 0.000                      |       |      |
| <b>S<sub>2</sub>O<sub>3</sub><sup>2-</sup> (O)</b> | <i>TS</i>    | 0.459                      | 0.331                      | 0.839 | 45.8 |
|                                                    | <i>P</i>     | 0.000                      | 0.862                      |       |      |
|                                                    | % <i>Evi</i> | 53.11                      | 38.40                      |       |      |

**Table S12.** Wiberg bond indexes (Bi), evolution percent, synchronicity (Sy) and average value (%Evav) for the nucleophilic substitution of metolachlor

|                                                    |              | Wiberg bond<br>index (Bi)  |                            | Sy    | %Evav |
|----------------------------------------------------|--------------|----------------------------|----------------------------|-------|-------|
|                                                    |              | <i>B</i> <sub>(C-Cl)</sub> | <i>B</i> <sub>(C-Nu)</sub> |       |       |
| <b>Br<sup>-</sup></b>                              | <i>R</i>     | 0.976                      | 0.000                      |       |       |
|                                                    | <i>TS</i>    | 0.441                      | 0.446                      | 0.904 | 50.0  |
|                                                    | <i>P</i>     | 0.000                      | 0.985                      |       |       |
|                                                    | % <i>Evi</i> | 54.84                      | 45.21                      |       |       |
|                                                    |              | <i>B</i> <sub>(C-Cl)</sub> | <i>B</i> <sub>(C-Nu)</sub> |       |       |
| <b>I<sup>-</sup></b>                               | <i>R</i>     | 0.976                      | 0.000                      |       |       |
|                                                    | <i>TS</i>    | 0.377                      | 0.517                      | 0.928 | 57.3  |
|                                                    | <i>P</i>     | 0.000                      | 0.973                      |       |       |
|                                                    | % <i>Evi</i> | 61.40                      | 53.14                      |       |       |
|                                                    |              | <i>B</i> <sub>(C-Cl)</sub> | <i>B</i> <sub>(C-Nu)</sub> |       |       |
| <b>HS<sup>-</sup></b>                              | <i>R</i>     | 0.976                      | 0.000                      |       |       |
|                                                    | <i>TS</i>    | 0.525                      | 0.377                      | 0.898 | 42.0  |
|                                                    | <i>P</i>     | 0.000                      | 1.001                      |       |       |
|                                                    | % <i>Evi</i> | 46.26                      | 37.67                      |       |       |
|                                                    |              | <i>B</i> <sub>(C-Cl)</sub> | <i>B</i> <sub>(C-Nu)</sub> |       |       |
| <b>S<sub>2</sub>O<sub>3</sub><sup>2-</sup> (S)</b> | <i>R</i>     | 0.976                      | 0.000                      |       |       |
|                                                    | <i>TS</i>    | 0.474                      | 0.410                      | 0.893 | 46.5  |
|                                                    | <i>P</i>     | 0.000                      | 0.986                      |       |       |
|                                                    | % <i>Evi</i> | 51.48                      | 41.52                      |       |       |
|                                                    |              | <i>B</i> <sub>(C-Cl)</sub> | <i>B</i> <sub>(C-Nu)</sub> |       |       |
| <b>S<sub>2</sub>O<sub>3</sub><sup>2-</sup> (O)</b> | <i>R</i>     | 0.976                      | 0.000                      |       |       |
|                                                    | <i>TS</i>    | 0.446                      | 0.333                      | 0.832 | 46.5  |
|                                                    | <i>P</i>     | 0.000                      | 0.860                      |       |       |
|                                                    | % <i>Evi</i> | 54.28                      | 38.65                      |       |       |

**Table S13.**Wiberg bond indexes (Bi), evolution percent, synchronicity (Sy) and average value (%Evav) for the nucleophilic substitution of propachlor

|                                                    |             | Wiberg bond<br>index (Bi) |              | Sy    | %Evav |
|----------------------------------------------------|-------------|---------------------------|--------------|-------|-------|
|                                                    |             | $B_{(C-Cl)}$              | $B_{(C-Nu)}$ |       |       |
| <b>Br<sup>-</sup></b>                              | <i>R</i>    | 0.978                     | 0.000        | 0.903 | 49.2  |
|                                                    | <i>TS</i>   | 0.450                     | 0.438        |       |       |
|                                                    | <i>P</i>    | 0.000                     | 0.987        |       |       |
|                                                    | <i>%Evi</i> | 53.94                     | 44.38        |       |       |
|                                                    |             | $B_{(C-Cl)}$              | $B_{(C-Nu)}$ |       |       |
| <b>I<sup>-</sup></b>                               | <i>R</i>    | 0.978                     | 0.000        | 0.917 | 56.4  |
|                                                    | <i>TS</i>   | 0.381                     | 0.512        |       |       |
|                                                    | <i>P</i>    | 0.000                     | 0.991        |       |       |
|                                                    | <i>%Evi</i> | 61.03                     | 51.70        |       |       |
|                                                    |             | $B_{(C-Cl)}$              | $B_{(C-Nu)}$ |       |       |
| <b>HS<sup>-</sup></b>                              | <i>R</i>    | 0.978                     | 0.000        | 0.895 | 41.2  |
|                                                    | <i>TS</i>   | 0.532                     | 0.370        |       |       |
|                                                    | <i>P</i>    | 0.000                     | 1.004        |       |       |
|                                                    | <i>%Evi</i> | 45.56                     | 36.87        |       |       |
|                                                    |             | $B_{(C-Cl)}$              | $B_{(C-Nu)}$ |       |       |
| <b>S<sub>2</sub>O<sub>3</sub><sup>2-</sup> (S)</b> | <i>R</i>    | 0.978                     | 0.000        | 0.892 | 46.4  |
|                                                    | <i>TS</i>   | 0.475                     | 0.409        |       |       |
|                                                    | <i>P</i>    | 0.000                     | 0.989        |       |       |
|                                                    | <i>%Evi</i> | 51.39                     | 41.35        |       |       |
|                                                    |             | $B_{(C-Cl)}$              | $B_{(C-Nu)}$ |       |       |
| <b>S<sub>2</sub>O<sub>3</sub><sup>2-</sup> (O)</b> | <i>R</i>    | 0.978                     | 0.000        | 0.833 | 46.5  |
|                                                    | <i>TS</i>   | 0.447                     | 0.334        |       |       |
|                                                    | <i>P</i>    | 0.000                     | 0.862        |       |       |
|                                                    | <i>%Evi</i> | 54.24                     | 38.73        |       |       |
